# 1 **A Study on the Correlation between Adolescents' Online Social** 2 **Connections and Anxiety and Depression**

3 *Li Mengxuan<sup>1</sup>, Xu Jiajun<sup>2</sup>, Liu Ying<sup>3</sup>, Xu Jiaqi<sup>2</sup>, Chen Hong<sup>4\*</sup>*

4 1. Department of Hematology, West China Hospital, Sichuan University/West China School of  
5 Nursing, Sichuan University, Chengdu, China; 2. Mental Health Center, West China Hospital,  
6 Sichuan University, Chengdu, China; 3. Department of Orthopedics, West China Hospital, Sichuan  
7 University/West China School of Nursing, Sichuan University, Chengdu, China; 4. West China  
8 Hospital, Sichuan University/West China School of Nursing, Sichuan University, Chengdu, China

9  
10 Abstract: **OBJECTIVE:** To investigate the current status of anxiety and depression among  
11 adolescents and to analyze the correlation between adolescents' online social connections and their  
12 depression and anxiety. **METHODS:** The study adopted a cross-sectional survey research design,  
13 conducted in a middle school located in a city in Sichuan Province. Classes were selected through  
14 simple random sampling, with all students in the selected classes serving as study participants.  
15 Anxiety, depression, and online social connections were assessed using the Chinese version of the  
16 DSM-5 Anxiety Inventory for Children and Adolescents, the DSM-5 Depression Inventory for  
17 Children and Adolescents, and the Revised Social Connectedness Scale, respectively. **RESULTS:**  
18 The prevalence rates of anxiety and depression among the participants were found to be 49.1% and  
19 47.1%, respectively. A significant positive correlation was identified between online social  
20 connections and both anxiety and depression. **CONCLUSION:** The findings indicate a concerning

21 prevalence of anxiety and depression among adolescents. It is crucial for healthcare professionals to  
22 recognize the multifaceted factors contributing to these mental health challenges and to remain  
23 vigilant regarding adolescent mental health. Leveraging the impact of online social connections, early  
24 psychological intervention strategies should be implemented to promote healthy online relationships  
25 and mitigate the risks of anxiety and depression among adolescents.

26 Keywords: Anxiety; Depression; Online social connections; Adolescents

## 27 **Preamble**

28       Mental health challenges, particularly anxiety and depression, represent significant public  
29 health concerns among adolescents. Depression threatens adolescent mental health by  
30 increasing the risk of suicidal behavior not only during adolescence <sup>[1]</sup> but also serving as an  
31 indicator of potential suicidal tendencies in adulthood <sup>[2]</sup>. In addition to this, anxiety is a key  
32 impediment to the overall development of adolescents, adversely affecting their physical health,  
33 academic performance, and social skills <sup>[3]</sup>. Various factors contribute to anxiety and  
34 depression within this demographic, including gender, family income, parental education,  
35 parent-child relationships, study efficiency, and daily physical activity <sup>[4,5]</sup> .

36       Social connectedness refers to the subjective sense of belonging and closeness  
37 experienced by individuals in their relationships with others and this feeling of connection can  
38 be shaped by their experiences of close relationships, such as with family, friends, and other  
39 social groups, as well as their experiences of estrangement from strangers or society as a whole  
40 <sup>[6]</sup>. In today's digital age, cybersocial bonding has emerged as a unique form of social  
41 connection. It refers to the extension of real social bonds into the realm of non-face-to-face  
42 interactions facilitated by electronic mediums, particularly online platforms. The National  
43 Research Report on Internet Use by Minors in 2021 revealed that an astonishing 96.8% of  
44 underage individuals in China are utilizing the Internet, indicating an extremely high level of  
45 internet penetration among this group <sup>[7]</sup>. With the advent of the digital age, teenagers' lives  
46 and studies have become inseparable from the online realm, and their social activities on the  
47 internet are increasing by the day. Overseas studies have shown a correlation between online  
48 social connections and mental health issues such as anxiety and depression among adolescents

49 [8,9]. However, the findings regarding this correlation have been inconsistent, with varying  
50 degrees of strength. Therefore, this study aims to investigate adolescents in order to gain insight  
51 into the relationship between online social connections and anxiety and depression. The results  
52 of this study will provide a scientific basis for implementing targeted interventions to promote  
53 the physical and mental well-being of adolescents.

## 54 **1. Objects and Methods**

### 55 1.1 Subject of the Study

56 This study is a cross-sectional survey research conducted in Bazhong City, Sichuan  
57 Province, in September 1, 2022 - October 31, 2022. A middle school was selected using a  
58 simple random sampling method, and nine classes were chosen to represent the sample  
59 population. All eligible students in the selected classes were invited to participate in the survey.  
60 Prior to the survey, the purpose, methodology, and significance of the study were explained to  
61 the respondents. To ensure full understanding, both the respondents and their guardians were  
62 informed of the specific content and purpose of the survey. Written informed consent has been  
63 obtained from the guardians. Formal ethical approval was obtained from the Ethics Committee  
64 of West China Hospital, Sichuan University (Approval No. 2019-907). According to the  
65 sample content estimation method proposed by Kendall, the sample size should be 10-20 times  
66 the number of independent variables. Considering that this study involves 22 independent  
67 variables, a sample size of 220-440 was determined. A total of 402 questionnaires were  
68 distributed, and 397 valid questionnaires were returned, resulting in an effective recovery rate  
69 of 98.8%.

70 The inclusion criteria for this study were as follows: (1) age between 11 and 17 years old,

71 and (2) willingness to participate in the psychological assessment survey, with a signed  
72 informed consent form from their guardians.

73 The exclusion criteria were as follows: (1) individuals with severe physical illnesses, (2)  
74 individuals with severe mental disorders, (3) individuals with intellectual developmental  
75 disorders, and (4) individuals with hereditary diseases or peripheral nerve disorders.

## 76 1.2 Research Tools

### 77 1.2.1 General Information Collection Questionnaire

78 The general information collection questionnaire was designed by the researcher to gather  
79 demographic data from the study participants. Information such as gender, age, place of  
80 residence, only child status, previous illnesses, current medications, and family financial  
81 situation were included. The content of the questionnaire was reviewed and revised by experts  
82 on the research team.

### 83 1.2.2 Social Connection Scale Revised (SCS-R)

84 The Social Connection Scale Revised (SCS-R) was originally developed and refined by  
85 Lee et al.<sup>[10]</sup>. Fan Xiaolan et al.<sup>[11]</sup> then translated and further revised the scale. It consists of 20  
86 items, divided into two main sections: social connectedness and social disconnectedness. In the  
87 section on social connectedness, items 1, 2, 4, 5, 8, 10, 12, 14, 16, and 19 are included. In the  
88 section on social disconnectedness, items 3, 6, 7, 9, 11, 13, 15, 17, 18, and 20 are included,  
89 with reverse scoring applied to all the items in this section. The scale utilizes a six-point Likert  
90 scale, where each item is scored from "1" to "6". A score of "1" indicates "Strongly Disagree"  
91 and a score of "6" indicates "Strongly Agree". Higher scores indicate a greater perceived  
92 closeness in interpersonal situations. The Cronbach's alpha coefficient for the SCS-R was

93 calculated to assess the internal consistency of the scale. The coefficient was found to be 0.911  
94 for the total social connectedness scale, 0.822 for the social connectedness dimension, and  
95 0.867 for the social disconnectedness dimension.

### 96 1.2.3 DSM-5 Anxiety Scale for Children and Adolescents Chinese Version

97 The DSM-5 Anxiety Scale for Children and Adolescents is specifically designed for  
98 assessing generalized anxiety symptoms in adolescents aged 11 to 17 years. The English  
99 version of the scale has obtained official licensure from the Patient Measurement Reporting  
100 Information System Health Organization (PROMIS Health Organization or PHO). To cater to  
101 Chinese-speaking populations, the Personality and Psychopathology Research Group from the  
102 School of Psychology and Cognitive Science at Peking University undertook the translation of  
103 the scale. Subsequently, Zhang Yewen et al <sup>[12]</sup> revised and enhanced the content of this  
104 Chinese version. The scale comprises 13 items, each aiming to evaluate the extent of anxiety  
105 experienced by the adolescent over the past week. Employing a five-point Likert rating system,  
106 respondents rate the frequency of occurrence for each item, ranging from 1 (never) to 5 (almost  
107 always). The total score of the scale ranges from 13 to 65, whereby scores equal to or exceeding  
108 28 are indicative of the presence of anxiety symptoms. Moreover, a higher score indicates a  
109 greater severity of anxiety experienced by the individual. The internal consistency of the scale,  
110 as measured by Cronbach's alpha coefficient, was found to be 0.90 for the total scale. The  
111 Cronbach's alpha coefficients for the general anxiety and situational anxiety factors were 0.89  
112 and 0.73, respectively. The scale also demonstrated good test-retest reliability, with a  
113 coefficient of 0.78 for the total scale. Additionally, the test-retest correlation coefficients for  
114 the two factors were 0.63 and 0.67, respectively.

#### 115 1.2.4 DSM-5 Depression Scale for Children and Adolescents

116 The DSM-5 Depression Scale for Children and Adolescents is a recognized instrument  
117 designed to evaluate the severity of depressive symptoms in individuals aged 11 to 17. The  
118 scale contains 14 different items, each of which has 5 rating levels: 1 for "never", 2 for "almost  
119 never", 3 for "sometimes", 4 for "often", and 5 for "Almost Always". Total scores on the scale  
120 range from 14 to 70, with a score of  $\geq 32$  indicating the presence of depressive symptoms.  
121 Higher scores on the scale correspond to more severe levels of depression. The reliability  
122 coefficient for internal consistency, as measured by Cronbach's alpha, was found to be 0.95 in  
123 this particular study. Additionally, the KMO measure of sampling adequacy yielded a value of  
124 0.947, indicating high suitability of the scale for assessment purposes.

#### 125 1.3 Quality Control

126 Researchers undergo standardized training and adhere to uniform instructions during the  
127 research process. The questionnaires are completed in a controlled environment, with measures  
128 in place to protect the confidentiality of the responses. To facilitate efficient data entry, a  
129 comprehensive data management system is developed. This system incorporates quality  
130 control measures, such as predefined value ranges and logical checks, to ensure data accuracy  
131 and reliability. Moreover, a robust data cleansing and validation procedure is established,  
132 performed by highly skilled personnel, to guarantee the consistency of data management and  
133 analysis.

#### 134 1.4 Statistical Analysis

135 The data entry process was conducted utilizing the Excel software, while the analysis of  
136 the collected data was performed using SPSS 26.0. The descriptive analysis of count data

137 involved presenting the frequency counts and constitutive ratios. Furthermore, to examine the  
 138 relationship between online social connections and anxiety among adolescents, Spearman's  
 139 correlation analysis was employed.

## 140 2. Results

### 141 2.1 Analysis of General and Demographic Information

142 A total of 402 questionnaires were collected. After excluding 5 invalid questionnaires,  
 143 397 valid questionnaires were obtained, resulting in an effective recovery rate of 98.8%. Of the  
 144 respondents, 230 were male and 167 were female, resulting in a sex ratio of 1.38. The mean  
 145 age of the participants was (13.95±1.01) years. Please refer to Table 1 for further details.

146 **Table 1 Comparison of Anxiety and Depression Detection Rates in Different Subgroups of**  
 147 **Adolescents**

| groups                                                | options (as in computer software settings) | Number of cases (percentage, %) | anxiety        |                | depression |                |                |         |
|-------------------------------------------------------|--------------------------------------------|---------------------------------|----------------|----------------|------------|----------------|----------------|---------|
|                                                       |                                            |                                 | detection rate | $\chi^2$ value | P-value    | detection rate | $\chi^2$ value | P-value |
| Gender                                                | male                                       | 230 (57.9)                      | 46.1           | 2.01           | 0.156      | 45.2           | 0.78           | 0.377   |
|                                                       | Female                                     | 167 (42.1)                      | 53.3           |                |            | 49.7           |                |         |
| Age                                                   | 11                                         | 1(0.3)                          | 100            | 14.411         | 0.008      | 100            | 22.238         | <0.001  |
|                                                       | 12                                         | 33 (8.3)                        | 27.3           |                |            | 24.2           |                |         |
|                                                       | 13                                         | 100 (25.2)                      | 41             |                |            | 36             |                |         |
|                                                       | 14                                         | 122 (30.7)                      | 51.6           |                |            | 47.5           |                |         |
|                                                       | 15                                         | 133 (33.5)                      | 57.9           |                |            | 60.2           |                |         |
|                                                       | 16                                         | 8 (2.0)                         | 50             |                |            | 50             |                |         |
| One-child family                                      | Yes                                        | 98 (24.7)                       | 48             | 0.07           | 0.791      | 52             | 1.273          | 0.259   |
|                                                       | No                                         | 299 (75.3)                      | 49.5           |                |            | 45.5           |                |         |
| Hand                                                  | Left hand                                  | 17 (4.3)                        | 47.1           | 0.03           | 0.862      | 41.2           | 0.25           | 0.617   |
|                                                       | Right-hand side                            | 380 (95.7)                      | 49.2           |                |            | 47.4           |                |         |
| Previous Diseases                                     | Yes                                        | 72 (18.1)                       | 54.2           | 0.897          | 0.344      | 55.6           | 2.522          | 0.112   |
|                                                       | No                                         | 325 (81.9)                      | 48             |                |            | 45.2           |                |         |
| Current medication (non-psychotropic or psychotropic) | Yes                                        | 42 (11.8)                       | 52.4           | 0.2            | 0.655      | 40.5           | 0.828          | 0.363   |
|                                                       | No                                         | 355 (88.2)                      | 48.7           |                |            | 47.9           |                |         |
| City of residence                                     | Municipalities                             | 148 (37.3)                      | 46.6           | 1.433          | 0.497      | 42.6           | 2.329          | 0.31    |
|                                                       | Cities and towns                           | 220 (55.4)                      | 49.5           |                |            | 49.1           |                |         |
|                                                       | Countryside                                | 29 (7.3)                        | 58.6           |                |            | 55.2           |                |         |
| Family economic situation                             | Poor                                       | 4(1.0)                          | 100            | 6.72           | 0.118      | 75             | 3.125          | 0.561   |
|                                                       | Poorer                                     | 24 (6.0)                        | 54.2           |                |            | 58.3           |                |         |
|                                                       | General                                    | 295 (74.3)                      | 50.2           |                |            | 46.8           |                |         |



| groups                                          | options (as in computer software settings)      | Number of cases (percentage, %) | anxiety        |                | depression |                |                |         |
|-------------------------------------------------|-------------------------------------------------|---------------------------------|----------------|----------------|------------|----------------|----------------|---------|
|                                                 |                                                 |                                 | detection rate | $\chi^2$ value | P-value    | detection rate | $\chi^2$ value | P-value |
| Father's education                              | Wealthier economy                               | 72 (18.2)                       | 40.3           |                |            | 43.1           |                |         |
|                                                 | Very well off                                   | 2(0.5)                          | 50             |                |            | 50             |                |         |
|                                                 | Illiteracy                                      | 1(0.3)                          | 100            | 17.866         | 0.01       | 100            | 7.977          | 0.403   |
|                                                 | Elementary school                               | 24 (6.0)                        | 66.7           |                |            | 58.3           |                |         |
|                                                 | Middle school                                   | 131 (33.0)                      | 51.9           |                |            | 48.1           |                |         |
|                                                 | High school                                     | 136 (34.3)                      | 46.3           |                |            | 47.8           |                |         |
|                                                 | Secondary school                                | 20 (5.0)                        | 75             |                |            | 45             |                |         |
|                                                 | College undergraduate                           | 31 (7.8)                        | 38.7           |                |            | 48.4           |                |         |
|                                                 | Master's degree                                 | 51 (12.8)                       | 35.3           |                |            | 35.3           |                |         |
|                                                 | PhD                                             | 1(0.3)                          | 0              |                |            | 0              |                |         |
| Father's occupation                             | 2(0.5)                                          | 49.1                            |                |                | 100        |                |                |         |
|                                                 | Employees of large and medium-sized enterprises | 58 (14.6)                       | 50             | 0.413          | 0.982      | 44.8           | 0.521          | 0.973   |
|                                                 | Microenterprise staff                           | 97 (24.4)                       | 48.5           |                |            | 47.4           |                |         |
|                                                 | General clerk or sales clerk                    | 148 (37.3)                      | 49.3           |                |            | 48.6           |                |         |
|                                                 | Mechanic                                        | 74 (18.6)                       | 47.3           |                |            | 44.6           |                |         |
| Mother's education                              | Farmers, casual workers or Unemployed           | 20 (5.0)                        | 55             |                |            | 50             |                |         |
|                                                 | Illiteracy                                      | 2(0.5)                          | 50             | 8.704          | 0.243      | 50             | 10.212         | 0.145   |
|                                                 | Elementary school                               | 36 (9.1)                        | 63.9           |                |            | 66.7           |                |         |
|                                                 | Middle school                                   | 171 (43.1)                      | 52             |                |            | 46.2           |                |         |
|                                                 | High school                                     | 106 (26.7)                      | 44.3           |                |            | 47.2           |                |         |
|                                                 | Secondary school                                | 15 (3.8)                        | 40             |                |            | 33.3           |                |         |
|                                                 | College undergraduate                           | 33 (8.3)                        | 39.4           |                |            | 42.4           |                |         |
|                                                 | Master's degree                                 | 32 (8.1)                        | 43.8           |                |            | 37.5           |                |         |
|                                                 | PhD                                             | 0(0)                            | 0              |                |            | 0              |                |         |
|                                                 | Mother's occupation                             | 2(0.5)                          | 100            |                |            | 100            |                |         |
| Employees of large and medium-sized enterprises |                                                 | 29 (7.3)                        | 41.4           | 4.085          | 0.397      | 37.9           | 1.418          | 0.843   |
| Microenterprise staff                           |                                                 | 62 (15.6)                       | 51.6           |                |            | 45.2           |                |         |
| General clerk or sales clerk                    |                                                 | 211 (53.1)                      | 48.3           |                |            | 48.3           |                |         |
| Mechanic                                        |                                                 | 37 (9.3)                        | 40.5           |                |            | 45.9           |                |         |
| Mother's occupation                             | Farmers, casual workers or Unemployed           | 58 (14.6)                       | 58.6           |                |            | 50             |                |         |

148

149 2.2 Detection Rate of Anxiety and Depression

150 Among the adolescents surveyed, 195 individuals were detected with anxiety symptoms,  
 151 resulting in a detection rate of 49.1%. Additionally, 187 adolescents were detected with  
 152 depressive symptoms, resulting in a detection rate of 47.1%. Please refer to Table 2 for further  
 153 details.

154 **Table 2 The number and detection rate of anxiety and depression in adolescents**

|            | aggregate | number of people suffering from a disease | detection rate |
|------------|-----------|-------------------------------------------|----------------|
| anxiety    | 397       | 195                                       | 49.1           |
| depression | 397       | 187                                       | 47.1           |

155

156 **2.3 Correlations between Anxiety, Depression, and Online Social Connections**

157 The results presented in Table 3 demonstrate a significant and positive correlation  
158 between online social connections and anxiety. Similarly, network social connectedness is  
159 significantly and positively correlated with depression.

160 **Table 3 Analysis of the correlation between adolescents' online social connections and**  
161 **anxiety and depression**

|                           | online social connections | anxiety | depression |
|---------------------------|---------------------------|---------|------------|
| online social connections | 1.000                     |         |            |
| anxiety                   | 0.338**                   | 1.000   |            |
| depression                | 0.423**                   | 0.733** | 1.000      |

162

163 **2.4 Analysis of Factors Influencing Anxiety and Depression in Adolescents**

164 In order to examine the factors that influence anxiety and depression in adolescents,  
165 stratified regression analyses were performed. The dependent variables were anxiety and  
166 depression, and the independent variables included in the analysis were determined based on  
167 their statistical significance ( $p < 0.05$ ). The impact of online social connections on adolescent  
168 anxiety and depression was assessed, and the results indicated that this factor independently  
169 accounted for 13.3% of the variance in adolescent anxiety and 19.7% of the variance in  
170 depression. Detailed findings can be found in Tables 4 and 5.

171 **Table 4 Stratified regression analysis of factors influencing factors of adolescent anxiety**

| sports event |                           | Partial regression Coefficient | standard error | Standardized regression coefficient | t-value | P-value |
|--------------|---------------------------|--------------------------------|----------------|-------------------------------------|---------|---------|
| first        | (Constant)                | 9.383                          | 2.485          | -                                   | 3.776   | <0.001  |
| layer        | online social connections | 0.329                          | 0.042          | 0.368                               | 7.872   | <0.001  |
|              | (Constant)                | -14.420                        | 7.220          | -                                   | -1.997  | 0.047   |
| second       | online social             |                                |                |                                     |         |         |
| layer        | connections               | 0.321                          | 0.041          | 0.359                               | 7.777   | <0.001  |
|              | (a person's age)          | 1.740                          | 0.496          | 0.162                               | 3.504   | 0.001   |

1) adjusted  $R^2 = 0.133$ ,  $F=61.973$ ,  $p<0.001$ ; 2) adjusted  $R^2 = 0.157$ ,  $F=38.012$ ,  $p<0.001$ .

172

173

174

**Table 5 Stratified regression analysis of factors influencing factors of adolescent depression**

| sports event |                           | biased regression coefficient | standard error | Standardized regression coefficient | t-value | P-value |
|--------------|---------------------------|-------------------------------|----------------|-------------------------------------|---------|---------|
| first        | (Constant)                | 5.539                         | 2.648          | -                                   | 2.092   | 0.037   |
| layer        | online social connections | 0.442                         | 0.045          | 0.447                               | 9.920   | <0.001  |
|              | (Constant)                | -31.473                       | 7.558          | -                                   | -4.164  | <0.001  |
| second       | online social connections | 0.429                         | 0.043          | 0.434                               | 9.937   | <0.001  |
| layer        | (a person's age)          | 2.705                         | 0.520          | 0.227                               | 5.206   | <0.001  |

175 adjusted  $R^2 = 0.197$ ,  $F=98.403$ ,  $P<0.001$ ; 2) adjusted  $R^2 = 0.247$ ,  $F=66.005$ ,  $P<0.001$ ; 3)

176 adjusted  $R^2 = 0.260$ ,  $F=47.268$ ,  $P<0.001$

177

### 178 3. Discussion

#### 179 3.1 Anxiety and Depression Levels in Adolescents

180 The present study yielded noteworthy findings regarding the detection rates of anxiety  
 181 and depression in adolescents. The prevalence of anxiety detection was found to be 49.1%,  
 182 whereas the prevalence of depression detection was 47.1%. A comprehensive meta-analysis  
 183 encompassing data from 27 countries reported that the prevalence of anxiety among secondary  
 184 school students was 6.5%, whereas the prevalence of depression was 2.6%<sup>[14]</sup>. Additionally,  
 185 a study conducted in China by Liu Xiaoqun et al.<sup>[15]</sup> revealed detection rates of 15.1% for  
 186 anxiety and 20.4% for depression. Another study conducted in Hunan Province, involving

187 10,220 secondary school students, indicated detection rates of 11.7% for anxiety symptoms  
188 and 15.3% for depressive symptoms over a two-week period. The detection rates of anxiety  
189 and depressive mood observed in our study were comparatively higher than those reported in  
190 the aforementioned studies. One possible explanation for this discrepancy could be attributed  
191 to the utilization of the DSM-5 Anxiety and Depression Scale for Children and Adolescents,  
192 which is renowned for its heightened sensitivity. Moreover, it is important to acknowledge that  
193 adolescents traverse an intricate phase characterized by substantial academic pressures, coping  
194 with physical development and peer interactions, rendering them more susceptible to  
195 experiencing anxiety and depression. Furthermore, the unprecedented challenges posed by the  
196 COVID-19 pandemic exacerbate the psychological strain encountered by adolescents. The  
197 implementation of prolonged online learning has deprived them of the familiar school and  
198 classroom environment, consequently reducing their opportunities for peer interaction.  
199 Consequently, this sense of isolation and uncertainty regarding knowledge acquisition may  
200 facilitate the development of depression and anxiety among adolescents.

### 201 3.2 Anxiety is Positively Associated with Online Social Connections

202 The findings of this study reveal a positive relationship between adolescent anxiety and  
203 online social connections. Individuals with anxiety tend to compensate for the lack of offline  
204 relationships by actively engaging in their social lives within the online sphere <sup>[16]</sup>. Moreover,  
205 research has demonstrated that for individuals with high levels of anxiety, the correlation  
206 between online social interactions and emotional support, as well as the correlation between  
207 online social interactions and the desire to socialize, is much stronger <sup>[17]</sup>. Anxious individuals  
208 may increase their online interactions as a means of avoiding face-to-face interactions <sup>[18]</sup>. The

209 online environment provides a sense of comfort and serves as a primary social channel, often  
210 replacing face-to-face interactions.

### 211 3.3 Depression is Positively Correlated with Online Social Connections

212 The results of the correlation analysis of this study show that adolescent depression is  
213 positively associated with online social connection. The study show that depression tends to be  
214 more prevalent among individuals who engage in prolonged online media use <sup>[9]</sup>. However  
215 Nakagomi et al <sup>[19]</sup> have argued that using the internet for communication actually has a  
216 protective effect on the likelihood of developing clinical depression. It is worth noting, though,  
217 that higher levels of depressive symptoms have been found to predict a smaller number of  
218 friends on Facebook and decreased contact between friends, albeit to a lesser extent on average  
219 <sup>[20]</sup>. These inconsistencies may be attributed to the fact that excessive immersion in the online  
220 environment reduces the time spent engaged in face-to-face interactions and limits  
221 opportunities for social engagements, thereby impacting the risk of depression.

## 222 4. Limitations

223 There are several limitations associated with this study. Firstly, the generalizability or  
224 representativeness of the findings may be somewhat constrained due to the exclusivity of the  
225 sample, which was obtained solely from a single educational institution. To enhance the  
226 validity and applicability of the results, it would be beneficial to increase the sample size in  
227 future studies and extend the research to encompass a broader range of schools and regions.  
228 Secondly, in order to obtain a more comprehensive and profound insight into the study subject,  
229 it is imperative to validate the findings by replicating the research in different geographical  
230 locations. This expansion would allow for a broader examination of the phenomenon, leading

231 to a more robust and nuanced understanding.

## 232 **5. Conclusion**

233 The findings of this study indicate a high prevalence of anxiety and depression symptoms  
234 in adolescents, with a noteworthy positive association between online social connections and  
235 anxiety and depression. Prolonged engagement in online interactions among adolescents may  
236 result in tangible social isolation, consequently elevating the risk of anxiety and depression.  
237 Thus, it is necessary for practice to evaluate the internet usage patterns and mental well-being  
238 of adolescents in order to identify any existing issues. Through educational initiatives and  
239 training programs, we can aid adolescents in cultivating healthy online habits and prevent  
240 mental health complications. For those adolescents who have already encountered mental  
241 health problems, we can offer psychological support and guide them towards professional  
242 assistance, thereby facilitating the development of effective interventions.

## 243 bibliography

- 244 [1] Shen Yan, Zheng Jiao, Shi Zhanming, et al. Anxiety and depression among children and  
245 adolescents in Chongqing. *International Journal of Psychiatry*. 2021;48: 991-993.
- 246 [2] Dylan Johnson, Dupuis Gabrielle, Piche Justin, et al. Adult mental health outcomes of  
247 adolescent depression: a systematic review. *Anxiety*. 2018;35 (8): 700-716.
- 248 [3] Li Yuxia. Adolescent depression and anxiety and their associated factors. *Chinese Journal*  
249 *of Health Psychology*. 2013;21: 415-417.
- 250 [4] Jing Chunyuan, Qin Huiling, Xiao Pei, et al. Study on the current situation of adolescent  
251 mental health and its influencing factors in Hubei Province during the period of

- 252 normalized epidemic prevention and control. Chinese Journal of Social Medicine.  
253 2022;39: 426-431.
- 254 [5] LIU Shanshan, CHEN Xu, LI Yaqiong, et al. Depression and anxiety among adolescents  
255 in Beijing during the novel coronavirus pneumonia epidemic and its influencing factors.  
256 Journal of Capital Medical University. 2021;42: 412-417.
- 257 [6] Yu Juan. The relationship between social connectedness and sense of meaning in life  
258 among middle school students. 2022.
- 259 [7] China Internet Network Information Center (CNNIC), Research Report on National  
260 Minors' Internet Use in 2021 [EB/OL], (2022-12-1), [2023-3-7],  
261 <https://www.cnnic.net.cn/n4/2022/1201/c1116-10690.html>.
- 262 [8] Sayeed Akhter, Islam Mohammad Habibul, Haider Sheikh Kabir Uddin, et al., Moderating  
263 effects of gender and passive Facebook use on the relationship between social interaction  
264 anxiety and preference for online social interaction[EB/OL],(6),[<Go to  
265 ISI>://WOS:000679622200001.
- 266 [9] Mindy Lee, Murphy Karen, Andrews Glenda. Using Media While Interacting Face-to-Face  
267 Is Associated With Psychosocial Well-Being and Personality Traits. Psychological  
268 Reports. 2019;122 (3): 944-967.
- 269 [10] R. M. Lee, Draper M., Lee S. Social connectedness, dysfunctional interpersonal behaviors,  
270 and psychological distress: Testing a mediator model. Journal of Counseling Psychology.  
271 2001;48 (3): 310-318.
- 272 [11] FAN Xiaolan, WEI Jia, ZHANG Jinfu. Reliability test of the revised version of the Social  
273 Connection Scale in a group of middle school students. Journal of Southwest Normal

- 274 University (Natural Science Edition). 2015;40: 118-122.
- 275 [12] ZHANG Yu-Wen, ZHANG Xiu-Ming, ZHONG Jie, et al. Preliminary revision of the  
276 Chinese version of the DSM-5 Anxiety Scale for Children and Adolescents. Chinese  
277 Journal of Mental Health. 2018;32: 552-557.
- 278 [13] American Psychiatric Association, Online assessment measures [EB/OL], (2014), [2017-  
279 5], <http://www.psychiatry.org/practice/dsm/dsm5/online-assessment-measures>.
- 280 [14] Guilherme V. Polanczyk, Salum Giovanni A., Sugaya Luisa S., et al. Annual Research  
281 Review: a meta-analysis of the worldwide prevalence of mental disorders in children and  
282 adolescents. Journal of Child Psychology and Psychiatry. 2015;56 (3): 345-365.
- 283 [15] LIU Xiaoqun, YANG Mengsi, PENG Chang, et al. Anxiety and depression in secondary  
284 school students with different roles in school bullying. Chinese Journal of Mental Health.  
285 2021;35: 475-481.
- 286 [16] Anne Beaudry, Pinsonneault Alain. The Other Side of Acceptance: Studying the Direct  
287 and Indirect Effects of Emotions on Information Technology Use. Mis Quarterly. 2010;  
288 34 (4): 689-710.
- 289 [17] Chih-Lun Wu, Horng Shwu-Min. Social Commerce Intention, Social Interaction, and  
290 Social Support: Moderating the Role of Social Anxiety. Journal of Organizational and  
291 End User Computing. 2022;34 (1).
- 292 [18] Shin Prizant-Passal, Shechner Tomer, Aderka Idan M. Social anxiety and internet use - A  
293 meta-analysis: what do we know? what are we missing? Computers in Human Behavior.  
294 2016;62: 221-229.
- 295 [19] Atsushi Nakagomi, Shiba Koichiro, Kondo Katsunori, et al. Can Online Communication



- 296 Prevent Depression Among Older People? A Longitudinal Analysis. Journal of Applied  
297 Gerontology. 2022;41 (1): 167-175.
- 298 [20] Sonya Negriff. Depressive Symptoms Predict Characteristics of Online Social Networks.  
299 Journal of Adolescent Health. 2019;65 (1): 101-106
